# Supplementary material for: Polymorphism of Drug Transporters, Rather Than Metabolizing Enzymes, Conditions the Pharmacokinetics of Rasagiline
Source: MDPI journal article supplement (doi:10.3390/pharmaceutics14102001), 2022-09-21
Supplement: s1 [file s1]

**Table S1.** VIPOA2 customized array genes and alleles/variants analyzed in the present work.

| Gene    | Allele/Variant          | Gene    | Allele/Variant          | Gene    | Allele/Variant        |
|---------|-------------------------|---------|-------------------------|---------|-----------------------|
| ABCB1   | C1236T (rs1128503)      | CYP2C19 | *6 (rs72552267)         | CYP2D6  | *14 (rs5030865)       |
|         | C3435T (rs1045642)      |         | *7 (rs72558186)         |         | *15 (rs774671100)     |
|         | G2677A (rs2032582)      |         | *8 (rs41291556)         |         | *17 (rs28371706)      |
|         | G2677T (rs2032582)      |         | *9 (rs17884712)         |         | *19 (rs72549353)      |
| ABCC2   | rs2273697               | CYP2C8  | *17 (rs12248560)        |         | *29 (rs59421388)      |
|         | rs3740066               |         | *35 (rs12769205)        | NAT2    | *41 (rs28371725)      |
| ABCC3   | rs4793665               |         | *2 (rs11572103)         |         | *56B (rs72549347)     |
|         | rs9895420               |         | *3 (rs10509681)         |         | *59 (rs79292917)      |
| ABCG2   | rs2231137               | CYP2C9  | *3 (rs11572080)         | SLC22A1 | *6 (rs1799930)        |
|         | rs2231142               |         | *4 (rs1058930)          |         | *7 (rs1799931)        |
|         | rs7699188               |         | *2 (rs1799853)          |         | *5 (rs1801280)        |
| CES1    | rs71647871              |         | *3 (rs1057910)          |         | rs628031              |
|         | rs2244613               | CYP3A4  | *5 (rs28371686)         | SLC6A2  | *2 (rs72552763)       |
|         | rs8192935               |         | *8 (rs7900194)          |         | *3 (rs12208357)       |
| COMT    | rs13306278              |         | *8 (rs9332094)          |         | *5 (rs34059508)       |
|         | rs4680                  |         | *11 (rs28371685)        | SLC22A2 | rs12708954            |
|         | rs4818                  | CYP3A43 | *1B (rs2740574)         |         | rs3785143             |
| CYP1A1  | rs5993883               |         | *1G (rs2242480)         |         | rs316019              |
|         | *2A (rs4646903)         |         | *2 (rs55785340)         | SLC28A3 | rs7853758             |
|         | *2B (rs1048943)         | CYP3A5  | *3 (rs4986910)          |         | rs2306283             |
| CYP1A2  | *4 (rs1799814)          |         | *4 (rs55951658)         | SLCO1B1 | *2 (rs56101265)       |
|         | *1B (rs2470890)         |         | *5 (rs55901263)         |         | *3, *13 (rs56061388)  |
|         | *1C (rs2069514)         |         | *6 (rs4646438)          |         | *4, *14 (rs11045819)  |
|         | *1E (rs2069526)         |         | *18 (rs28371759)        |         | *5 (rs4149056)        |
|         | *1F (rs762551)          |         | *20 (rs67666821)        |         | *6 (rs55901008)       |
|         | *1K (rs12720461)        |         | *22 (rs35599367)        |         | *9, *31 (rs59502379)  |
| CYP1B1  | *4 (rs72547516)         | CYP2D6  | *2 (rs61469810)         |         | *10, *12 (rs56199088) |
|         | *2 (rs10012)            |         | *3 (rs776746)           | UGT1A1  | *17, *21 (rs4149015)  |
|         | *3 (rs1056836)          |         | *6 (rs10264272)         |         | rs8330                |
| CYP2A6  | *4 (rs1800440)          |         | *7 (rs41303343)         |         | *6 (rs4148323)        |
|         | rs28399433              |         | *2 (rs16947)            |         | *80 (rs887829)        |
| CYP2B6  | *4, *7, *16 (rs2279343) | UGT1A4  | *2, *8, *10 (rs1135840) | UGT1A6  | rs2011425             |
|         | *5, *7 (rs3211371)      |         | *3 (rs35742686)         |         | rs7592281             |
|         | *6, *7, *9 (rs3745274)  |         | *4 (rs3892097)          |         | *3A (rs10445704)      |
|         | *16, *18 (rs28399499)   |         | *6 (rs5030655)          | UGT1A8  | *2 (rs1042597)        |
|         | *22 (rs34223104)        | UGT1A9  | *7 (rs5030867)          |         | rs10929302            |
| CYP2C19 | *2 (rs4244285)          |         | *8 (rs5030865)          | UGT2B7  | *2(rs7668258)         |
|         | *3 (rs4986893)          |         | *9 (rs5030656)          |         | rs61750900            |
|         | *4 (rs28399504)         |         | *10 (rs1065852)         | UGT2B15 | rs1902023             |
|         | *5 (rs56337013)         |         | *12 (rs5030862)         |         | rs2008584             |

Alleles are shown along with tagging single nucleotide polymorphisms (SNPs) or variants; however, one variant may appear in several alleles.
